# Supplementary material for: Photo-crosslinking of polyethylene by mono- and diacetophenone derivatives and their precursors
Source: Royal Society of Chemistry journal article supplement (doi:10.1039/b909353b), 2009-07-21
Supplement: b909353b.pdf [file b909353b.pdf]

## Supplementary information for “Photo-crosslinking of polyethylene by mono- and di-acetophenone derivatives and their precursors”

Ivan Lukáč<sup>1\*</sup>, Csaba Kósa<sup>1</sup>, Richard G. Weiss<sup>2</sup>

<sup>1</sup>Polymer Institute, Slovak Academy of Sciences, Dúbravská cesta 9, 842 36 Bratislava, Slovak Republic

<sup>2</sup>Department of Chemistry, Georgetown University, Washington, D.C. 20057-1227, USA  
E-mail: [upolluka@savba.sk](mailto:upolluka@savba.sk), Tel: 00421 2 54777404, Fax: 00421 2 54775923

S1. Comparison of the C=O absorption stretching band frequency maxima in FT-IR spectra of the dopant ketones **4**, **6**, **7** and **8** in hexane solutions and in KBr pellets.

| ketone   | Wavenumbers [cm <sup>-1</sup> ] |      |
|----------|---------------------------------|------|
|          | hexane                          | KBr  |
| <b>4</b> | 1694                            | 1679 |
| <b>6</b> | 1694                            | 1677 |
| <b>7</b> | 1692 <sup>a</sup>               | 1685 |
| <b>8</b> | 1697 <sup>a</sup>               | 1685 |

<sup>a</sup> poor solubility

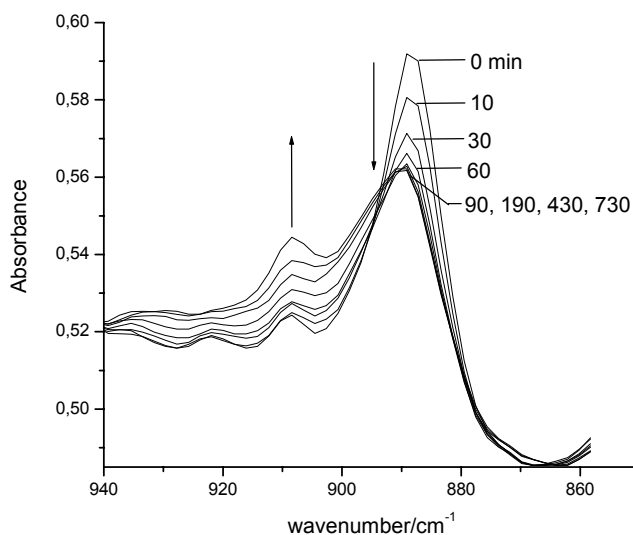

S2. FT-IR spectral changes for 2,2-di(4-acetylphenyl)propane (**4**) (0.036 mol/kg) in a PE film as a function of irradiation time.

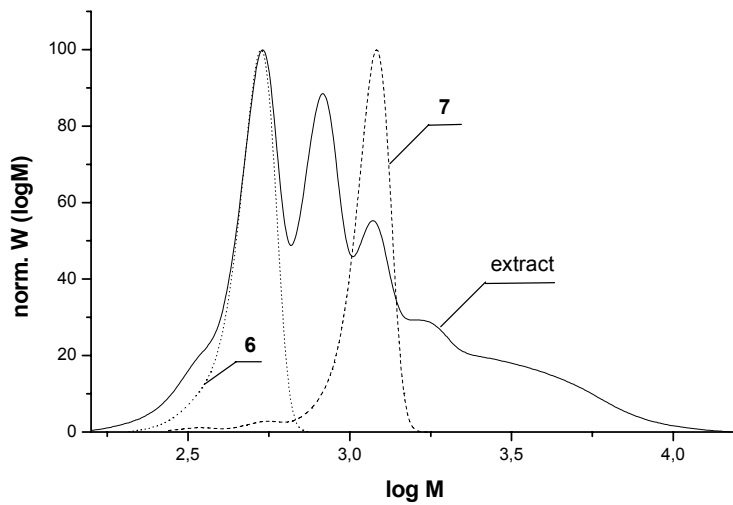

S3. Size exclusion chromatogram of 1,10-di(4-nonanoylphenyl)decane (**7**), 1,10-di(4-acetylphenyl)decane (**6**) and the extract from a **PE** film containing **7** that was irradiated for 1 h.

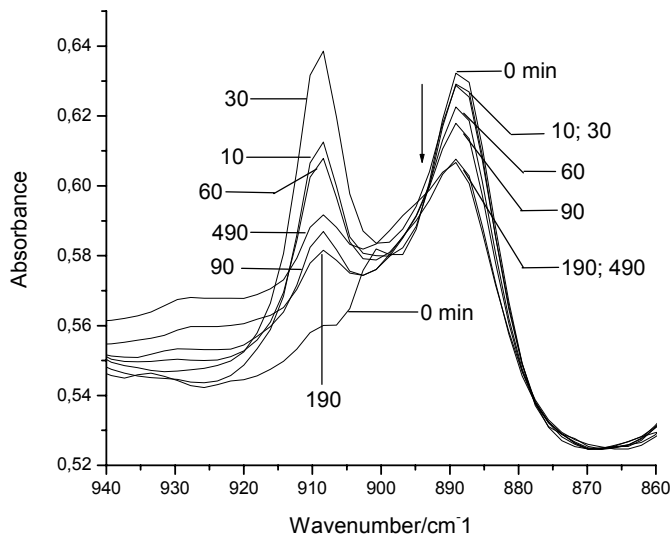

S4. FT-IR spectral changes for 1,10-di(4-nonanoylphenyl)decane (**7**) (0.036 mol/kg) in **PE** films as a function of irradiation time.

S5. Low molecular-mass products from 45 min irradiation of **7** in a **PE** film as estimated by GC-MS.

| Compound <sup>a</sup> /<br>(mol %) | Elution<br>time<br>(min) | Area<br>(%) | m/z peaks and intensities<br>(%)                                                                                                                                               |
|------------------------------------|--------------------------|-------------|--------------------------------------------------------------------------------------------------------------------------------------------------------------------------------|
| <b>7</b> /12.7                     | 17.09                    | 16.5        | 574-M (48,); 476 (36); 391 (65); 378 (26); 245 (48); 217 (72); 189 (88); 182 (72); 174 (100); 133 (65); 131 (69); 105 (48); 91 (48)                                            |
| <b>10</b> /1.2                     | 15.86                    | 1.6         | 556-M-H <sub>2</sub> O (42,); 538 (66); 476 (22); 458 (34); 391 (48); 245 (35); 219 (59); 217 (59); 199 (53); 157 (58); 143 (68); 133 (100); 131 (98); 105 (58); 91 (52)       |
| <b>12</b> /0.2                     | 14.96                    | 0.3         | 556-M-H <sub>2</sub> O (34); 538 (48); 458 (42); 440 (59); 217 (36); 199 (47); 157 (58); 155 (70); 143 (93); 133 (84); 129 (70); 117 (43); 91 (62); 71 (65); 57 (100); 43 (58) |
| <b>9</b> /27.3                     | 13.12                    | 29.3        | 476-M (39); 378 (72); 363 (53); 321 (19); 245 (22); 217 (38); 182 (49); 174 (100); 147 (46); 131 (37); 105 (28); 91 (40)                                                       |
| Unknown                            | 12.85                    | 0.7         | 474 (60); 472 (32); 456 (22); 363 (48); 215 (49); 174 (100); 131 (47); 105 (36); 91 (37); 43 (44)                                                                              |
| <b>11-trans</b> /8.6               | 12.68                    | 9.3         | 458 (39); 440 (17); 391 (22); 378 (93); 232 (22); 217 (51); 199 (22); 181 (50); 157 (35); 147 (100); 133 (71); 118 (26); 105 (42); 91 (42); 43 (50)                            |
| <b>11-cis</b> /2.5                 | 12.55                    | 2.7         | 458 (71); 440 (31); 401 (45); 378 (78); 217 (39); 199 (50); 181 (48); 157 (78); 147 (100); 143 (82); 133 (72); 131 (82); 117 (39); 105 (62); 91 (53); 43 (80)                  |
| <b>6</b> /45.4                     | 11.16                    | 38.7        | 378 (83); 363 (7); 336 (7); 321 (8); 232 (14); 174 (88); 147 (100); 134 (47); 105 (35); 91 (32); 43 (33)                                                                       |
| Unknown                            | 10.89                    | 1.2         | 362 (66); 260 (44); 175 (29); 159 (35); 147 (46); 145 (51); 131 (44); 118 (77); 117 (100); 105 (27); 91 (46); 43 (47)                                                          |

<sup>a</sup>See Scheme 3

S6. Low molecular-mass products isolated from 45 min irradiation of **8** in a **PE** film as estimated by GC-MS.

| Compound <sup>a</sup> /<br>concentration<br>(wt %) | Elution<br>time<br>(min) | m/z peaks and intensities<br>(%)                                                                                       |
|----------------------------------------------------|--------------------------|------------------------------------------------------------------------------------------------------------------------|
| <b>8</b> /47.4                                     | 11.42                    | 322 (M; 0.6); 304 (6); 286 (3); 203 (34); 133 (9); 120 (43); 105 (100); 77 (31);                                       |
| <b>16</b> /5.0                                     | 11.07                    | 304 (M-H <sub>2</sub> O; 5); 286 (M-2H <sub>2</sub> O; 2); 203 (17); 156 (17); 143 (24); 120 (44); 105 (100); 77 (37); |
| <b>13</b> /18.1                                    | 6.35                     | 202 (M; 2); 146 (9); 133 (11); 120 (73); 105 (100); 77 (38);                                                           |
| <b>17</b> /21.9                                    | 5.90                     | 174 (M; 9); 159 (3); 146 (7); 143 (7); 133 (45); 120 (100); 105 (57); 77 (22);                                         |
| <b>18</b> /0.4                                     | 3.80                     | 148 (M; 100); 133 (29); 105 (94); 91 (38); 79 (27); 77 (26); 43 (52)                                                   |
| <b>2</b> /7.2                                      | 2.56                     | 120 (M; 33); 105 (100); 77 (67); 51 (17)                                                                               |

<sup>a</sup>See Scheme 4
